# Supplementary material for: Binding of Host Cell Surface Protein Disulfide Isomerase by Anaplasma phagocytophilum Asp14 Enables Pathogen Infection
Source: PubMed Central journal article supplement (PMC6989111; doi:10.1128/mbio.03141-19), 2020-01-28

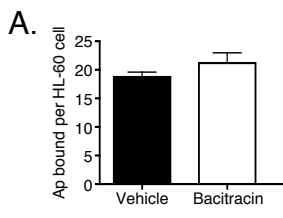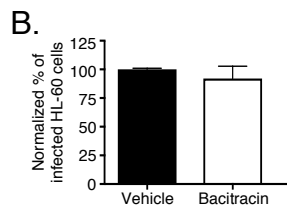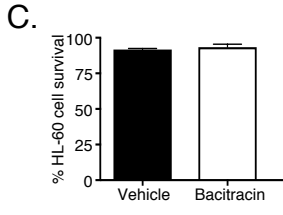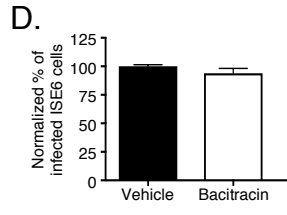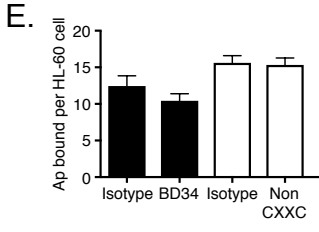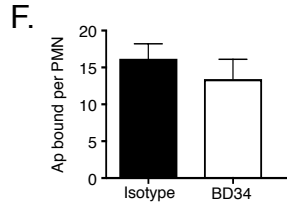

Supplement: mBio.03141-19-sf001.pdf [file mBio.03141-19-sf001.pdf]
